# Supplementary material for: At the speed of Juul: measuring the Twitter conversation related to ENDS and Juul across space and time (2017–2018)
Source: PubMed Central journal article supplement — Tob Control. 2020 Mar 20;30(2):137–46. doi: 10.1136/tobaccocontrol-2019-055427 (PMC7907568; doi:10.1136/tobaccocontrol-2019-055427), 2020-03-20
Supplement: tobaccocontrol-2019-055427supp001.pdf [file tobaccocontrol-2019-055427supp001.pdf]

## Appendix

Figure A. Amounts of tweets by Juul Labs and their retweets

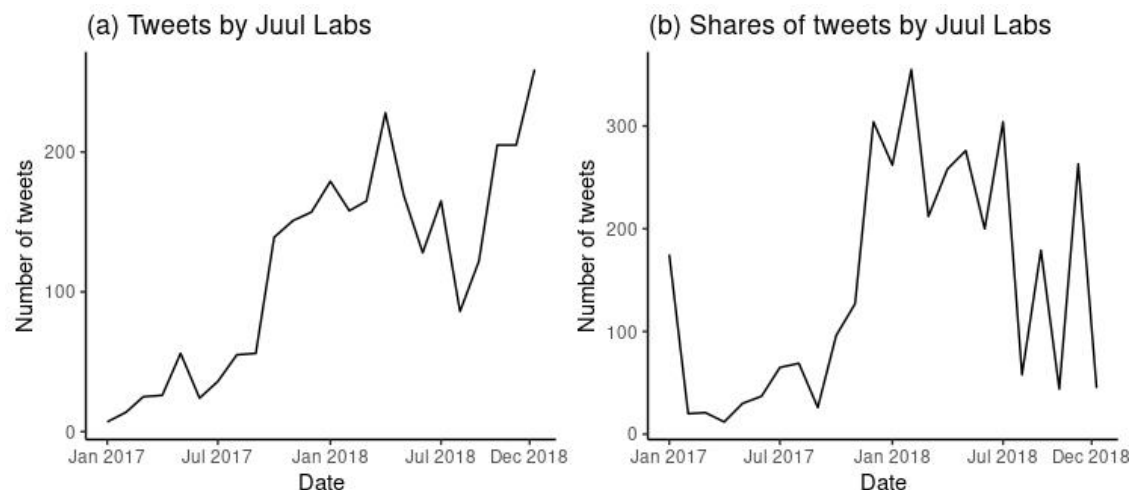

Table A. Frequency of counties by level of tweet rates (per 10,000) and by quarter

| Level of Juul-Related Tweet Rates (/10,000) |                 |                 |                |                |                |                 |
|---------------------------------------------|-----------------|-----------------|----------------|----------------|----------------|-----------------|
|                                             | 0               | 0.1-1.5         | 1.6-3.0        | 3.1-4.5        | 4.6-6.0        | 6.1+            |
| Q1: Jan-Mar 2017                            | 2678<br>(85.2%) | 460<br>(14.6%)  | 4<br>(0.13%)   | 0              | 0              | 0               |
| Q2: Apr-Jun 2017                            | 2307<br>(73.4%) | 826<br>(26.3%)  | 8<br>(0.25%)   | 1<br>(0.03%)   | 0              | 0               |
| Q3: Jul-Sep 2017                            | 2259<br>(71.9%) | 831<br>(26.4%)  | 41<br>(1.3%)   | 7<br>(0.22%)   | 2<br>(0.06%)   | 2<br>(0.06%)    |
| Q4: Oct-Dec 2017                            | 1487<br>(47.3%) | 1110<br>(35.3%) | 318<br>(10.1%) | 109<br>(3.4%)  | 48<br>(1.5%)   | 71<br>(2.2%)    |
| Q5: Jan-Mar 2018                            | 1292<br>(41.1%) | 1009<br>(32.1%) | 479<br>(15.2%) | 176<br>(5.6%)  | 63<br>(2.0%)   | 123<br>(3.9%)   |
| Q6: Apr-Jun 2018                            | 796<br>(25.3%)  | 637<br>(20.3%)  | 582<br>(18.5%) | 404<br>(12.8%) | 240<br>(7.6%)  | 483<br>(15.4%)  |
| Q7: Jul-Sep 2018                            | 566<br>(18.0%)  | 472<br>(15.0%)  | 540<br>(17.2%) | 424<br>(13.5%) | 337<br>(10.7%) | 803<br>(25.6%)  |
| Q8: Oct-Dec 2018                            | 501<br>(15.9%)  | 349<br>(11.1%)  | 464<br>(14.8%) | 435<br>(13.8%) | 312<br>(9.9%)  | 1081<br>(34.4%) |

| <b>Level of Non-Juul ENDS-related Tweet Rates (/10,000)</b> |                |                 |                |                |               |                |
|-------------------------------------------------------------|----------------|-----------------|----------------|----------------|---------------|----------------|
|                                                             | 0              | 0.1-1.5         | 1.6-3.0        | 3.1-4.5        | 4.6-6.0       | 6.1+           |
| Q1: Jan-Mar 2017                                            | 931<br>(29.6%) | 878<br>(27.9%)  | 582<br>(18.5%) | 297<br>(9.4%)  | 141<br>(4.5%) | 313<br>(10.0%) |
| Q2: Apr-Jun 2017                                            | 949<br>(30.2%) | 865<br>(27.5%)  | 592<br>(18.8%) | 291<br>(9.3%)  | 147<br>(4.7%) | 298<br>(9.5%)  |
| Q3: Jul-Sep 2017                                            | 843<br>(26.8%) | 817<br>(26.0%)  | 620<br>(19.7%) | 337<br>(10.7%) | 136<br>(4.3%) | 389<br>(12.4%) |
| Q4: Oct-Dec 2017                                            | 809<br>(25.7%) | 760<br>(24.2%)  | 666<br>(21.2%) | 327<br>(10.4%) | 202<br>(6.4%) | 378<br>(12.0%) |
| Q5: Jan-Mar 2018                                            | 876<br>(27.9%) | 845<br>(26.9%)  | 604<br>(19.2%) | 327<br>(10.4%) | 163<br>(5.2%) | 327<br>(10.4%) |
| Q6: Apr-Jun 2018                                            | 931<br>(29.6%) | 912<br>(29.0%)  | 638<br>(20.3%) | 283<br>(9.0%)  | 123<br>(3.9%) | 255<br>(8.1%)  |
| Q7: Jul-Sep 2018                                            | 966<br>(30.7%) | 1100<br>(35.0%) | 569<br>(18.1%) | 195<br>(6.2%)  | 107<br>(3.4%) | 205<br>(6.5%)  |
| Q8: Oct-Dec 2018                                            | 806<br>(25.6%) | 904<br>(28.8%)  | 628<br>(20.0%) | 347<br>(11.0%) | 136<br>(4.3%) | 321<br>(10.2%) |
